# Supplementary material
Source: PubMed Central journal article supplement (PMC5131639)
Supplement: NIHMS828046-supplement-Supplemental_Figure.pdf [file NIHMS828046-supplement-Supplemental_Figure.pdf]

**Create and Promote Antitobacco Brand**

**Establish Social Brand: HAVOC**

- Campaign designed to appeal to Partiers (value physical attractiveness and fashion consciousness, confidence, social and financial success)
- Events promoting brand's appeal, influence, and social acceptability within Partiers

**Association of HAVOC with Nonsmoking**

- Antitobacco messaging introduced after brand gains acceptance of Partiers (ex. through increased event attendance)
- Example messaging targeted toward Partiers:
  - "75% of young adults prefer to date, kiss, and be with non-smokers"
  - "Smoking decreases lung capacity, making it hard to stay fit"
  - "Smokers are four times more likely to feel like they don't sleep well, and more likely to have bags under their eyes than non-smokers"

**Promote and Reinforce  
Nonsmoking Lifestyle**

**Social events**

- At bars and nightclubs, featuring popular DJs and promoters
- Occurred 8-10 times a year

**Brand ambassadors**

- Social leaders, trendsetters
- Recruited and trained to spread brand's messaging

**Social media and Direct mail**

- HAVOC website, Twitter, Facebook, Youtube, and Instagram pages
- Advertise events and convey antitobacco messaging

**Social rewards**

- Clothing, prizes, VIP status
- Reinforce and promote healthy behavior
